# Supplementary material for: Deep Drug Discovery of Mac Domain of SARS-CoV-2 (WT) Spike Inhibitors: Using Experimental ACE2 Inhibition TR-FRET Assay, Screening, Molecular Dynamic Simulations and Free Energy Calculations
Source: MDPI journal article supplement (doi:10.3390/bioengineering10080961), 2023-08-14
Supplement: s1 [file s1]

Supporting Information

# Deep Drug Discovery of Mac Domain of SARS-CoV-2 (WT) Spike Inhibitors: Using Experimental ACE2 Inhibition TR-FRET Assay, Screening, Molecular Dynamic Simulations and Free Energy Calculations

Saleem Iqbal \* and Sheng-Xiang Lin \*

Axe Molecular Endocrinology and Nephrology, CHU Research Center and Laval University, Quebec City, QC G1V 4G2, Canada

\* Correspondence: Saleem.iqbal.1@ulaval.ca (S.I.); sheng-xiang.lin@crchudequebec.ulaval.ca (S.-X.L.)

## Supplementary Data

**Table S1.** Convolutional deep neural network-based approach named DOcking decoy selection with Voxel-based deep neural nEtworK (DOVE) for evaluating protein docking for SARS-CoV-2 models.

| PDB entry | ATOM+GOAP+ITScore* |
|-----------|--------------------|
| 6WOJ      | 0.49124            |
| 6M0J      | 0.17618            |

\* Input based on atom types, locations, and atoms' GOAP and ITScore energy scores in a 403 Å<sup>3</sup> cube in the interface area (within 10 Å), in which the cube center is the interface area center.

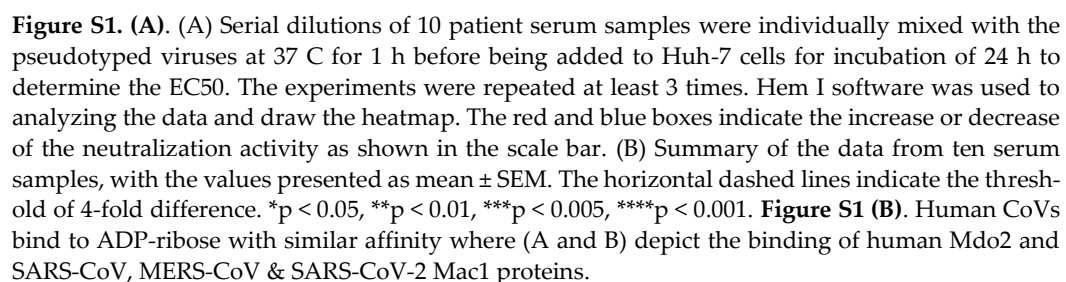

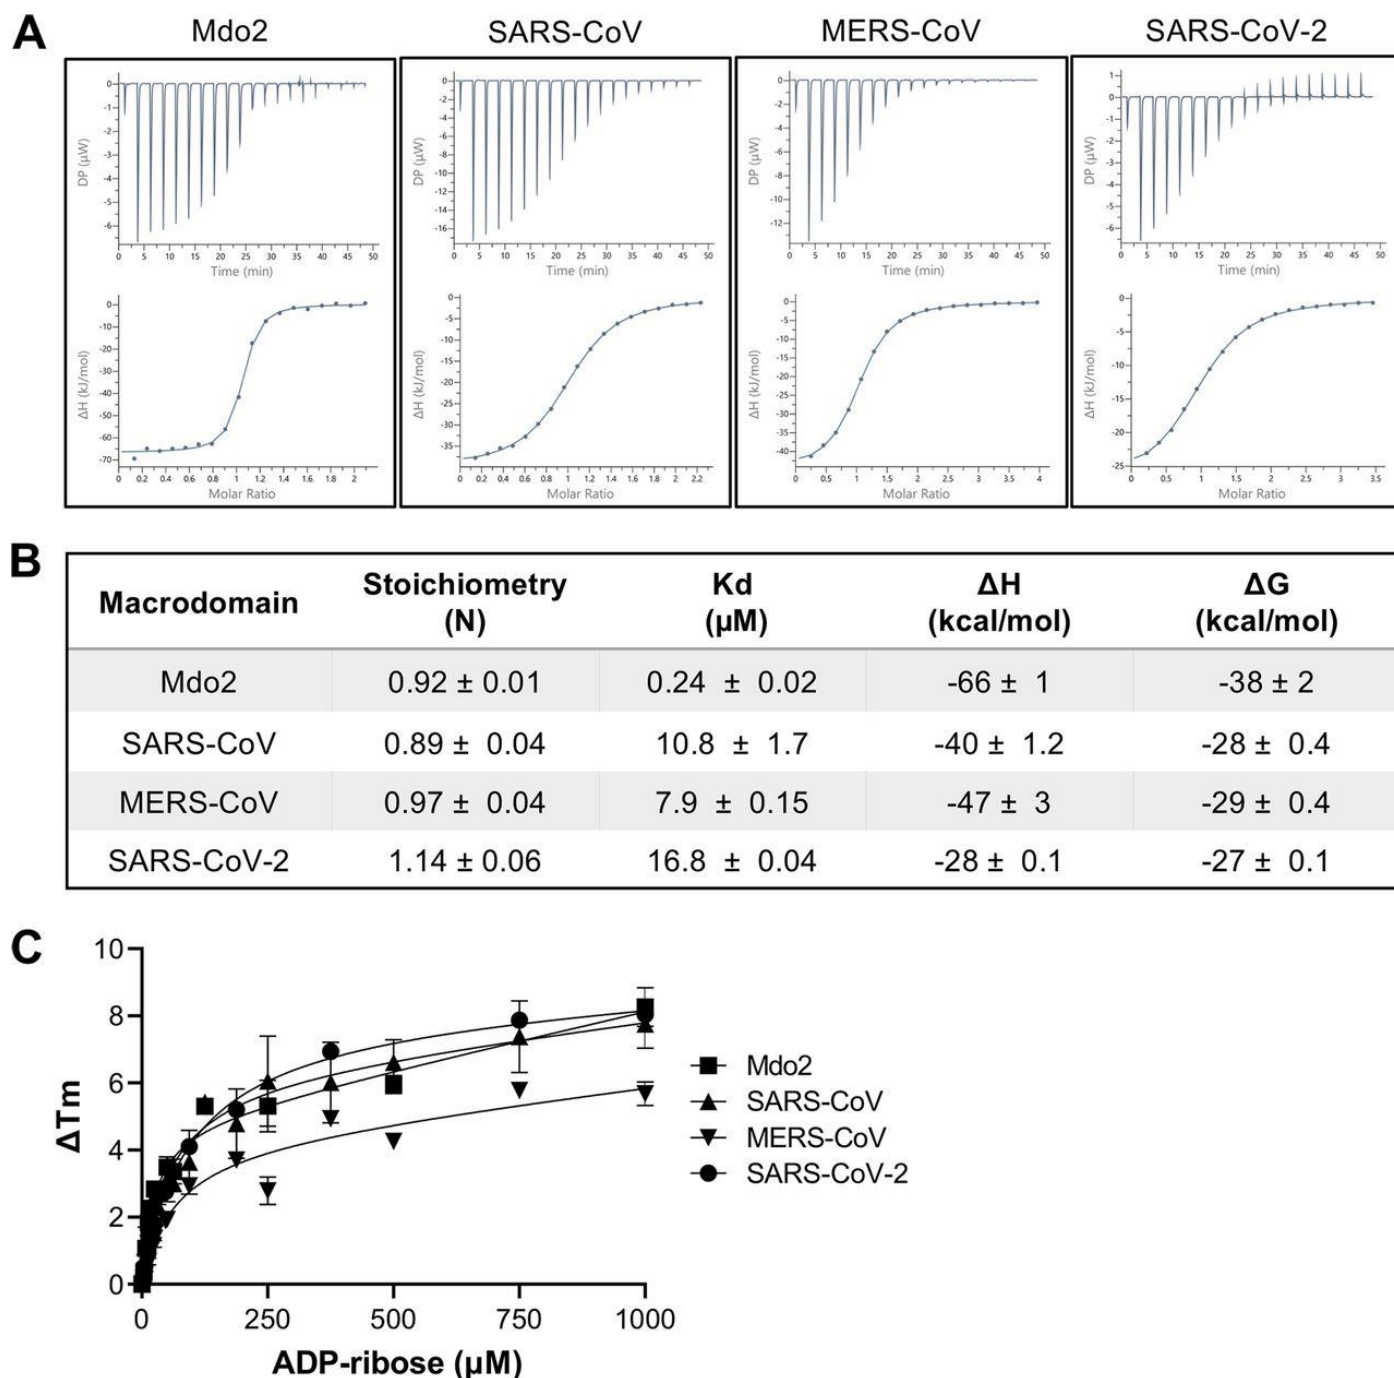

**Figure S2.** (A&B) All CoV Mac1 proteins bound to ADP-ribose with low micromolar affinity (7 to 16mM), while human Mdo2 bound with an affinity at least 30 times stronger (220 nM). Figure S2 (C). All four macrodomains subjected to assessment displayed elevated denaturation temperatures upon the introduction of ADP-ribose evidenced through thermal shift Assay. Representative Figure., Alhammad YMO, Kashipathy MM, Roy A, Gagné J-P, McDonald P, Gao P, Nonfoux L, Battaile KP, Johnson DK, Holmstrom ED, Poirier GG, Lovell S, Fehr AR. 2021. The SARS-CoV-2 conserved macrodomain is a mono-ADP-ribosylhydrolase. Reprinted with permission from Ref.[23].

**Table S2.** Enzymes and Substrates used for experiment.

| Enzyme             | Catalog # | Protein lot # | Assay concentration |
|--------------------|-----------|---------------|---------------------|
| ACE2-Eu            | 100705    | 210701        | 5 ng/rxn            |
| WT Spike S1-biotin | 100720    | 200423        | 100 ng/rxn          |

**Table S3.** List of Compounds and their test range used in this study for WT Spike: ACE2 Binding.

| Compound I.D. | Compound Supplied | Stock Concentration | Dissolving Solvent | Test Range (μM)     | Intermediate Dilution    |
|---------------|-------------------|---------------------|--------------------|---------------------|--------------------------|
| F5084-0852    | Solid             | 10 mM               | DMSO               | 30                  | 4 % DMSO in Assay Buffer |
| F1877-0839    | Solid             | 10 mM               | DMSO               | 30                  | 4 % DMSO in Assay Buffer |
| F2619-0022    | Solid             | 10 mM               | DMSO               | 30                  | 4 % DMSO in Assay Buffer |
| F1877-1292    | Solid             | 10 mM               | DMSO               | 30                  | 4 % DMSO in Assay Buffer |
| F0466-0005    | Solid             | 10 mM               | DMSO               | 30                  | 4 % DMSO in Assay Buffer |
| F2085-0027    | Solid             | 10 mM               | DMSO               | 30                  | 4 % DMSO in Assay Buffer |
| F0772-2453    | Solid             | 10 mM               | DMSO               | 30                  | 4 % DMSO in Assay Buffer |
| F0470-0003    | Solid             | 10 mM               | DMSO               | 30                  | 4 % DMSO in Assay Buffer |
| F0827-0193    | Solid             | 10 mM               | DMSO               | 30                  | 4 % DMSO in Assay Buffer |
| F2173-1125    | Solid             | 10 mM               | DMSO               | 30                  | 4 % DMSO in Assay Buffer |
| Anti-Spike*   | Solution          | 9 μM                | PBS                | 0.0001, 0.001, 0.01 | Assay Buffer             |

\* Reference inhibitor

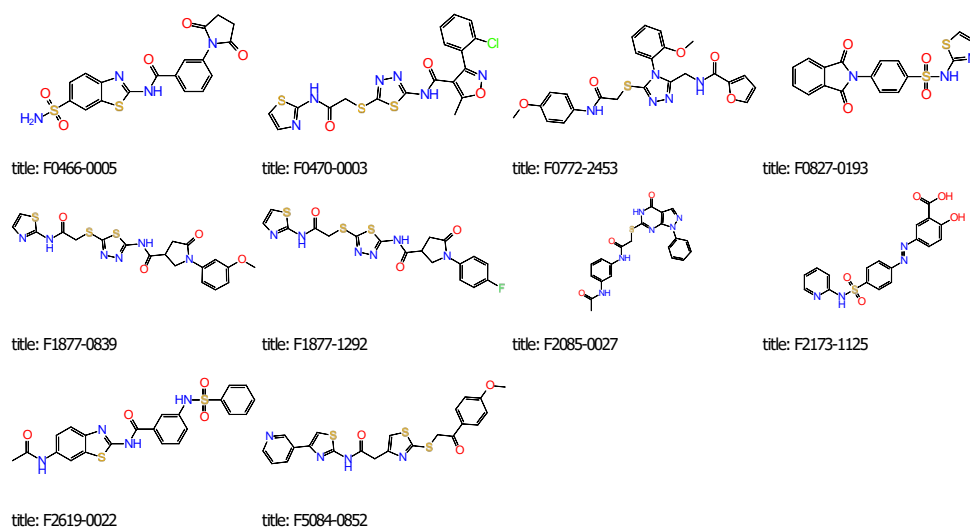

**Figure S3.** Top most selected ligands used for checking the efficacy of Effects of Compounds on WT Spike: ACE2 Binding.

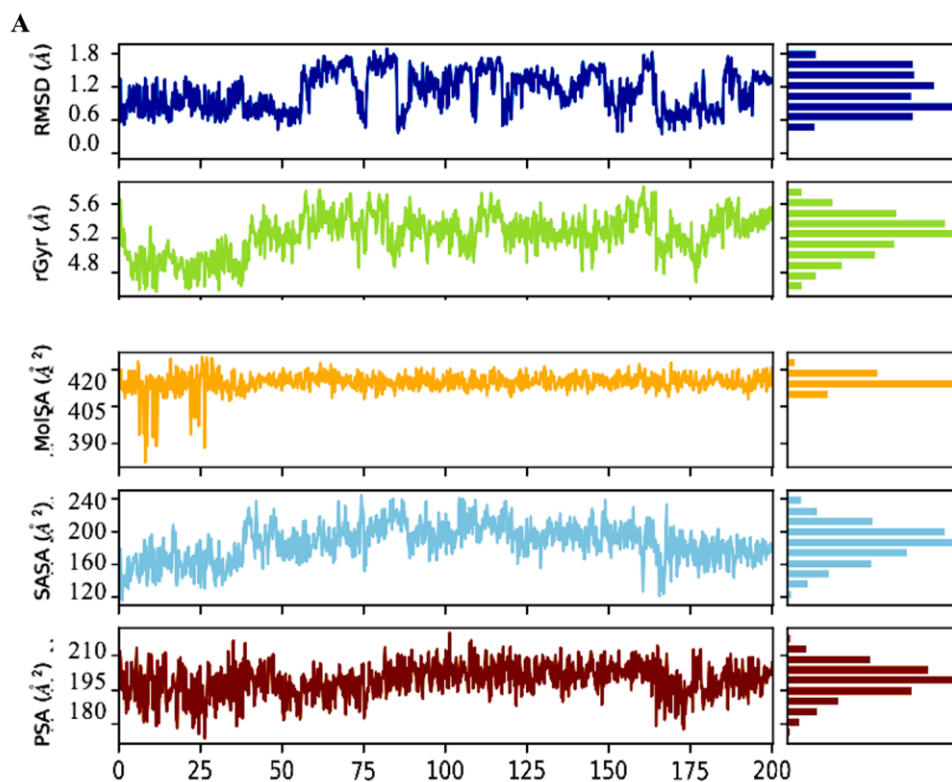

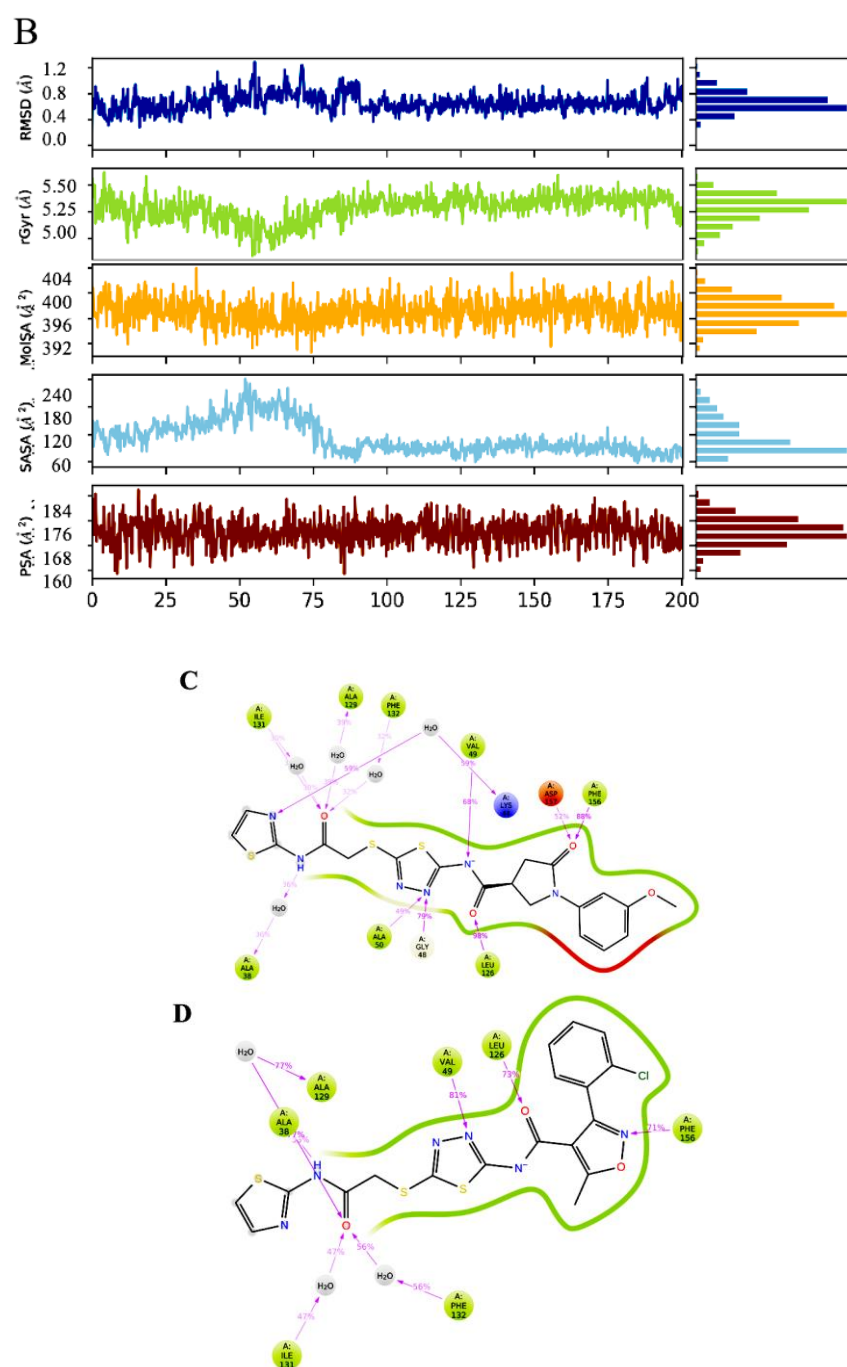

**Figure S4.** (A&B) Ligand properties in terms of PSA, SASA, and rGYR illustrating stability of simulated docked complexes of F1877-0839 and F0470-0003 respectively. (C&D): Simulated Interaction diagram of F1877-0839 and F0470-0003.

All the compounds for HTVS shown in **Figure S4**. were prepared and energy minimized using the Ligprep module of the Schrodinger (Schrodinger 14-2; Sastry, Adzhigirey, Day, Annabhi-moju, & Sherman, 2013), where (with) probable tautomeric and ionization states at pH = 7 ± 1 followed by minimization with OPLS 2005 force field. The ligands shown in Figure S3 were evaluated for checking the efficacy of Effects of Compounds on WT Spike: ACE2 Binding.

**Table S4.** Induced fit Docking results of all the selected compounds and cocrystal at the active site of the macrodomain.

| Compound ID | Docking Score | Glide Energy kcal/mol |
|-------------|---------------|-----------------------|
| F5084-0852  | -9.12         | -59.35                |
| F1877-0839  | -12.87        | -78.24                |
| F2619-0022  | -8.25         | -61.34                |
| F1877-1292  | -8.68         | -52.48                |
| F0466-0005  | -9.01         | -60.62                |
| F2085-0027  | -10.32        | -68.03                |
| F0772-2453  | -11.69        | -70.04                |
| F0470-0003  | -9.61         | -75.64                |
| F0827-0193  | -9.08         | -54.86                |
| F2173-1125  | -8.88         | -59.42                |
| Cocrystal   | -11.19        | -75.02                |

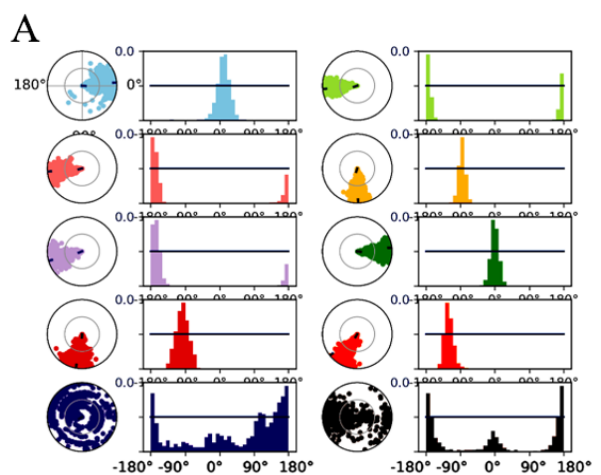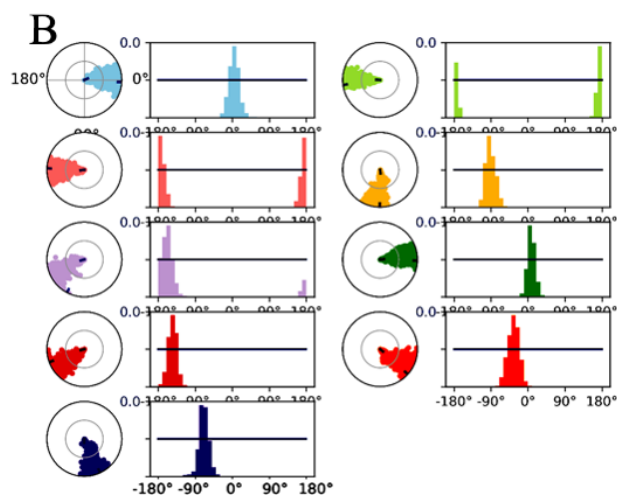

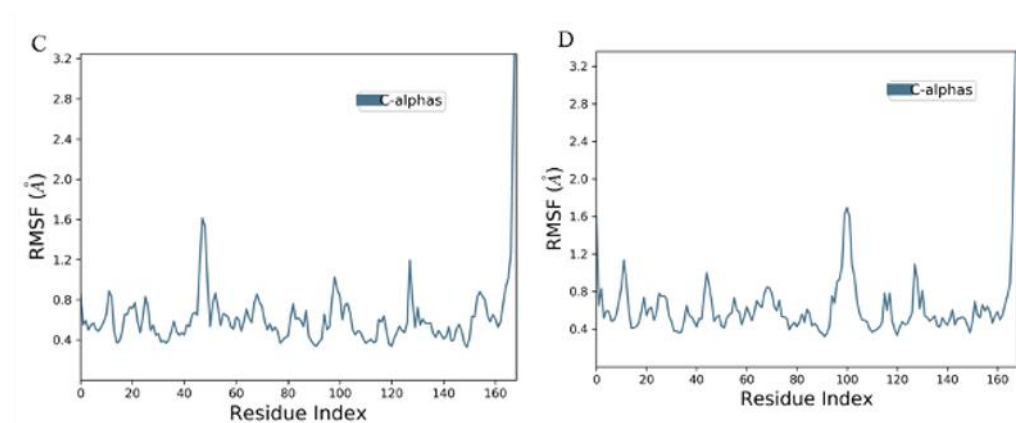

**Figure S5.** (A&B) Torsional profile of the drugs; F1877-0839 and F0470-0003. (C &D): correspond to the respective RMSF fluctuation of the drugs at the active site of the ligand.



**Table S5.** ADMET analysis of the inhibitors used in this study.

1

| Title      | FORMULA        | MOL_WEIGHT | NAME                                                                                                                           | donorHB | accptHB | QPlogP <sub>o</sub> | QPlogP <sub>w</sub> | QPlogP <sub>o/w</sub> | QPlogS | QPlogBB | QPlogK <sub>p</sub> | HumanO-<br>ralAb-<br>sorption | Peren-<br>tHu-<br>manOral-<br>Absorp-<br>tion | RuleOfFiv<br>e | RuleOfTh<br>ree |
|------------|----------------|------------|--------------------------------------------------------------------------------------------------------------------------------|---------|---------|---------------------|---------------------|-----------------------|--------|---------|---------------------|-------------------------------|-----------------------------------------------|----------------|-----------------|
| F0466-0005 | C18H14N4O5S2   | 430.46     | 3-(2,5-dioxypyrrolidin-1-yl)-N-(6-sulfamoyl-1,3-benzothiazol-2-yl)benzamide                                                    | 3       | 11.5    | 26.468              | 19.954              | 0.352                 | -4.669 | -2.793  | -5.758              | 2                             | 49.999                                        | 0              | 1               |
| F0470-0003 | C18H13ClN6O3S3 | 492.98     | 3-(2-chlorophenyl)-5-methyl-N-([[(1,3-thiazol-2-yl)carbamoyl]methyl)sulfanyl)-1,3,4-thiadiazol-2-yl]-1,2-oxazole-4-carboxamide | 2       | 10      | 25.24               | 16.359              | 3.262                 | -6.744 | -1.492  | -3.336              | 1                             | 86.156                                        | 0              | 1               |
| F0772-2453 | C24H23N5O5S    | 493.53     | N-([4-(2-methoxyphenyl)-5-([[(4-methoxyphenyl)carbamoyl]methyl)sulfanyl]-4H-1,2,4-triazol-3-yl)methyl)furan-2-carboxamide      | 2       | 9       | 24.336              | 14.841              | 4.153                 | -5.528 | -1.074  | -1.327              | 3                             | 100                                           | 0              | 0               |
| F0827-0193 | C17H11N3O4S2   | 385.42     | 4-(1,3-dioxo-2,3-dihydro-1H-isoindol-2-yl)-N-(1,3-thiazol-2-yl)benzene-1-sulfonamide                                           | 0       | 7       | 17.522              | 11.43               | 2.399                 | -4.276 | -1.347  | -3.216              | 3                             | 81.402                                        | 0              | 0               |
| F1877-0839 | C19H18N6O4S3   | 490.58     | 1-(3-methoxyphenyl)-5-oxo-N-([[(1,3-thiazol-2-yl)carbamoyl]methyl)sulfanyl)-1,3,4-thiadiazol-2-yl]pyrrolidine-3-carboxamide    | 2       | 12.25   | 27.589              | 18.377              | 2.323                 | -6.227 | -2.026  | -3.739              | 1                             | 77.017                                        | 0              | 1               |
| F1877-1292 | C18H15FN6O3S3  | 478.54     | 1-(4-fluorophenyl)-5-oxo-N-([[(1,3-thiazol-2-yl)carbamoyl]methyl)sulfanyl)-1,3,4-thiadiazol-2-yl]pyrrolidine-3-carboxamide     | 2       | 11.5    | 27.025              | 17.863              | 2.502                 | -6.409 | -1.753  | -3.669              | 1                             | 79.136                                        | 0              | 1               |
| F2085-0027 | C21H18N6O3S    | 434.47     | N-(3-acetamidophenyl)-2-([4-oxo-1-phenyl-1H,4H,5H-pyrazolo[3,4-d]pyrimidin-6-yl)sulfanyl)acetamide                             | 3       | 9.5     | 26.614              | 18.355              | 2.483                 | -5.973 | -2.077  | -3.566              | 3                             | 76.896                                        | 0              | 1               |
| F2173-1125 | C18H14N4O5S    | 398.39     | 2-hydroxy-5-[(E)-2-[4-[(pyridin-2-yl)sulfamoyl]phenyl]diazen-1-yl]benzoic acid                                                 | 1       | 8.25    | 20.914              | 14.074              | 2.456                 | -4.564 | -2.559  | -3.89               | 2                             | 59.994                                        | 0              | 1               |
| F2619-0022 | C22H18N4O4S2   | 466.53     | 3-benzenesulfonamido-N-(6-acetamido-1,3-benzothiazol-2-yl)benzamide                                                            | 3       | 11      | 27.972              | 20.002              | 2.441                 | -5.946 | -1.954  | -2.855              | 3                             | 80.176                                        | 0              | 1               |
| F5084-0852 | C22H18N4O3S3   | 482.6      | 2-(2-([2-(4-methoxyphenyl)-2-oxoethyl)sulfanyl]-1,3-thiazol-4-yl)-N-[4-(pyridin-3-yl)-1,3-thiazol-2-yl]acetamide               | 1       | 9.75    | 21.239              | 13.048              | 3.325                 | -3.462 | -0.364  | -1.499              | 3                             | 100                                           | 0              | 1               |

2

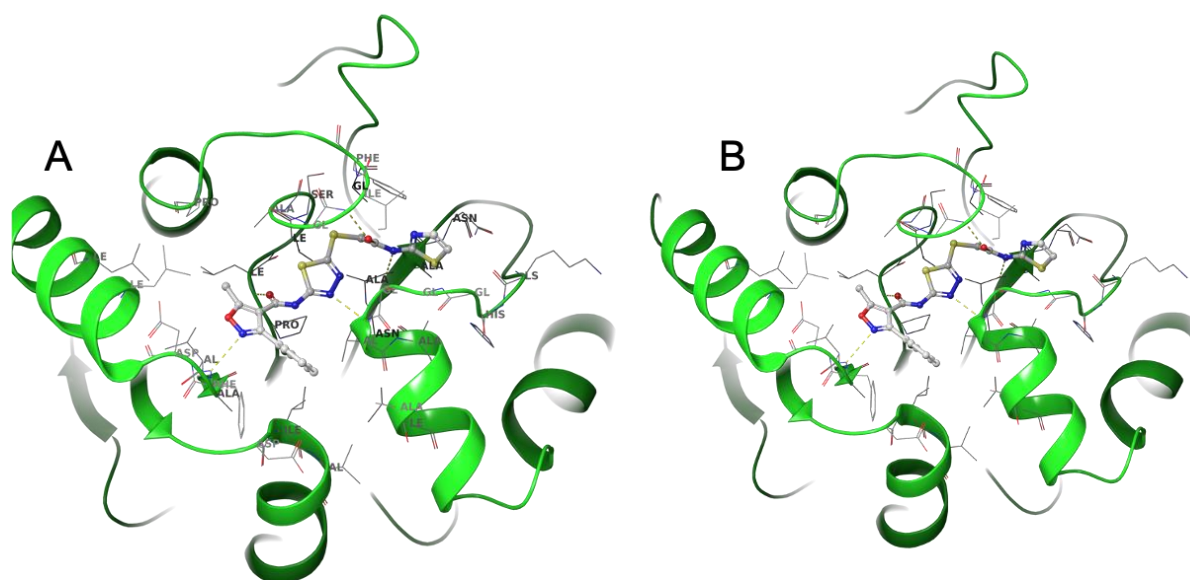

**Docked Complex of Compound ID: F1877-0839**

**Figure S6.** Docked complex of Compound ID: F1877-0839 WT Spike: ACE2 Binding (A) Labelled with Interacting residues (B) without interacting residues.

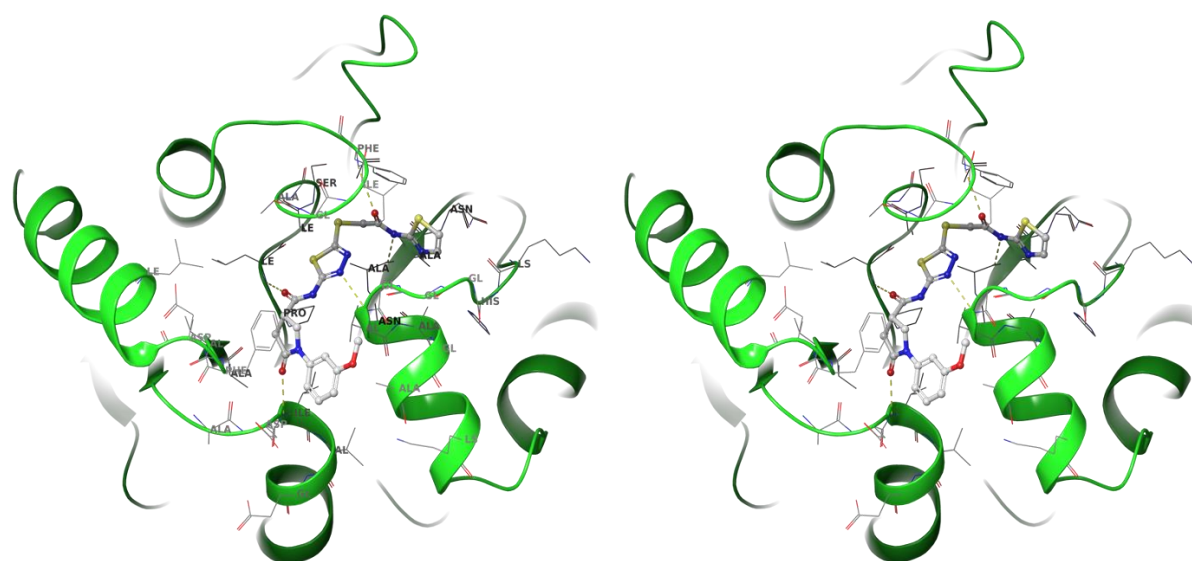

**Docked Complex of Compound ID: F0470-0003**

**Figure S7.** Docked complex of Compound ID: F0470-0003 WT Spike: ACE2 Binding (A) Labelled with Interacting residues (B) without interacting residues.

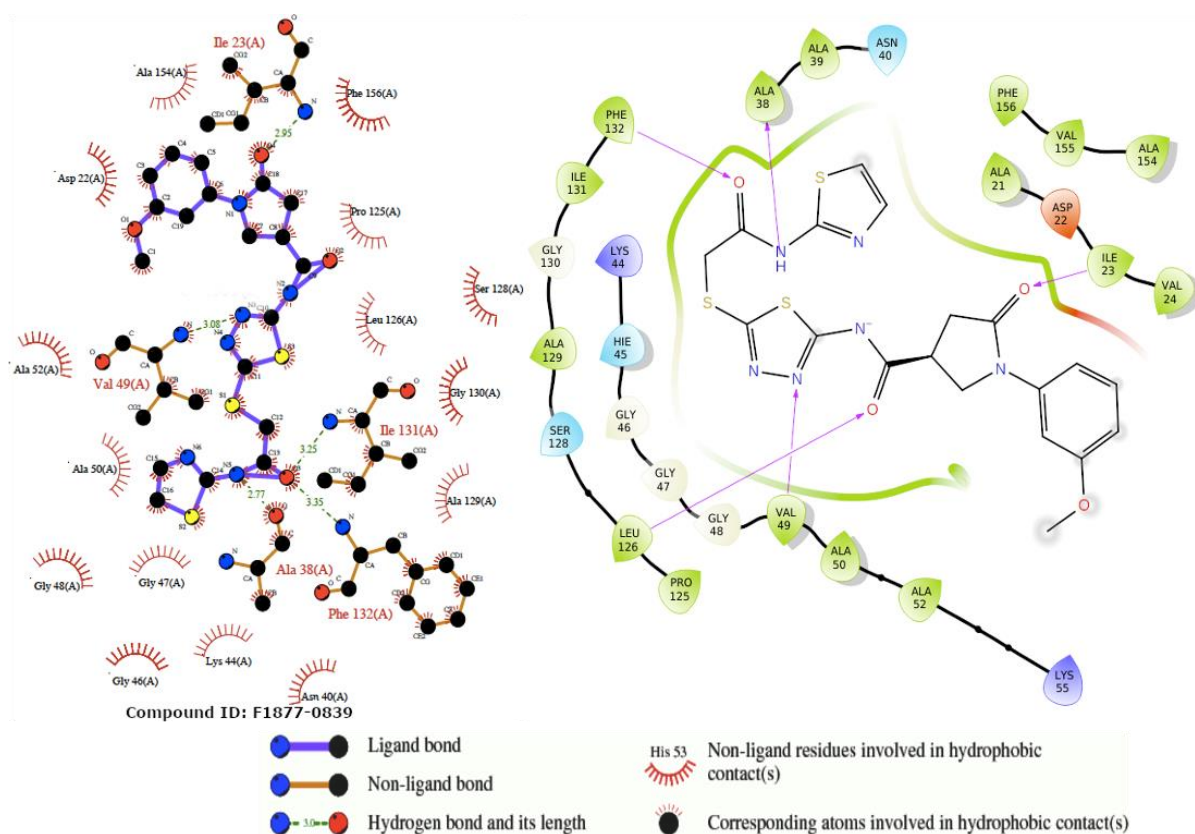

Figure S8. (Left): Ligplot Interactions of docked Complex of Compound ID: F1877-0839. (Right): schematic view of detailed ligand atom interactions with the protein residue.

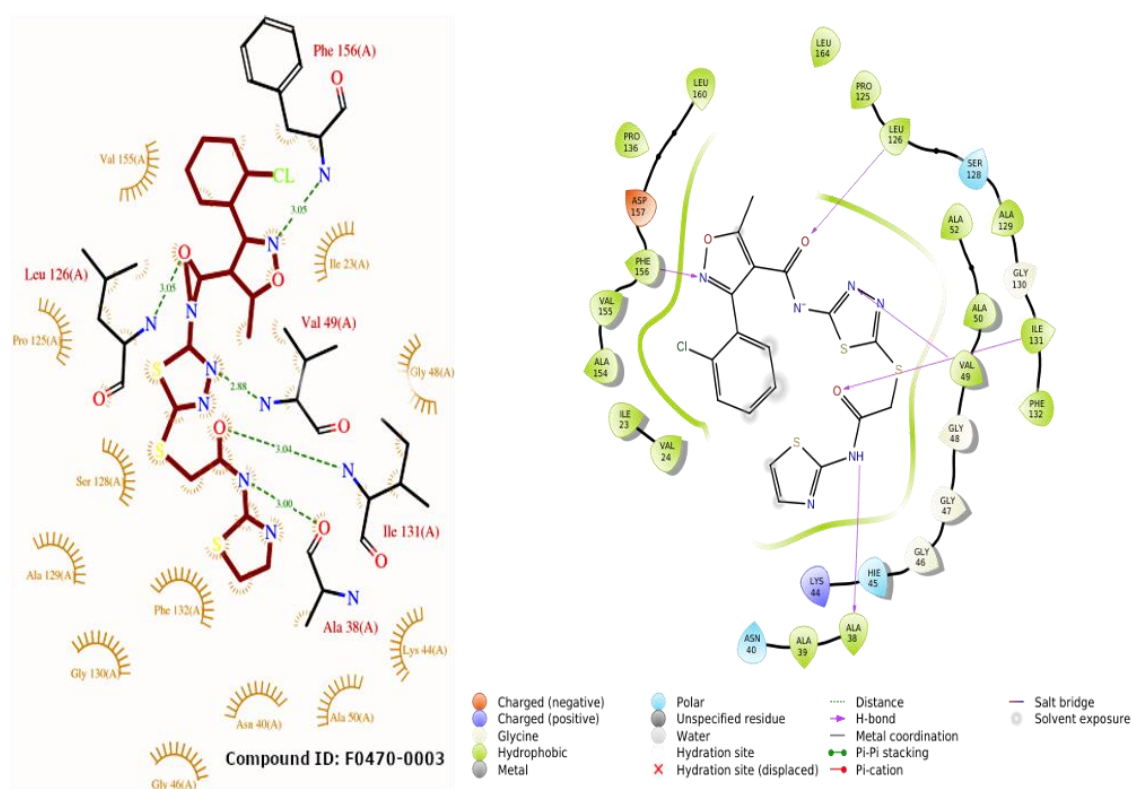

Figure S9. (Left): Ligplot Interactions of docked Complex of Compound ID: F0470-0003. (Right): schematic view of detailed ligand atom interactions with the protein residue.

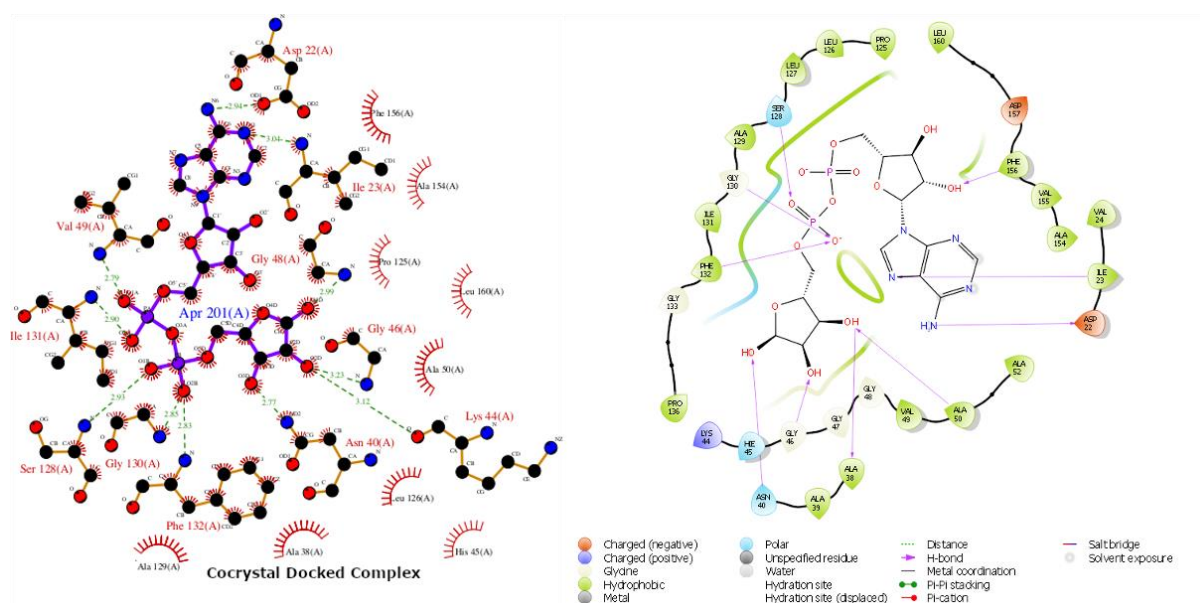

**Figure S10.** (Left): Ligplot Interactions of cocystal Docked Complex. (Right): schematic view of detailed ligand atom interactions with the protein residue.

15

16

17
